# Supplementary material
Source: Springer Nature journal article supplement (https://www.springermedizin.de/resource/supplementary/12943_2010_773_MOESM12_ESM.pdf/9554784)

C4-2B/Rx2<sup>dox</sup>

- + :Dox

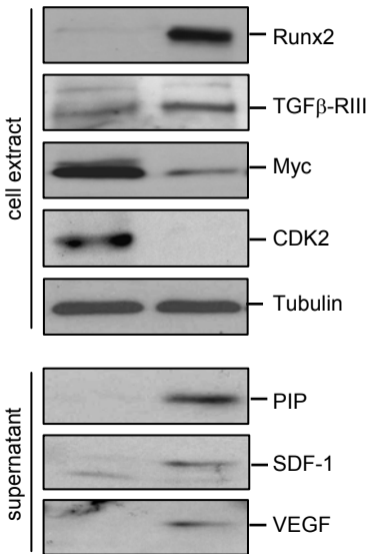

Supplement: MOESM12 [file 9554784]
